# Supplementary material for: Islands of CdSe nanoparticles within Se nanofibers: a room temperature ionic liquid templated synthesis
Source: Royal Society of Chemistry journal article supplement (doi:10.1039/c3dt51540k), 2013-01-01
Supplement: c3dt51540k.pdf [file c3dt51540k.pdf]

## Islands of CdSe Nanoparticles within Se Nanofibers: A Room Temperature Ionic Liquid Templated Synthesis

Apurav Guleria, Ajay K Singh, Madhab C. Rath, Soumyakanti Adhikari\* and Sisir K Sarkar

*Radiation & Photochemistry Division, Bhabha Atomic Research Centre, Mumbai 400 085, India*

### Supporting information

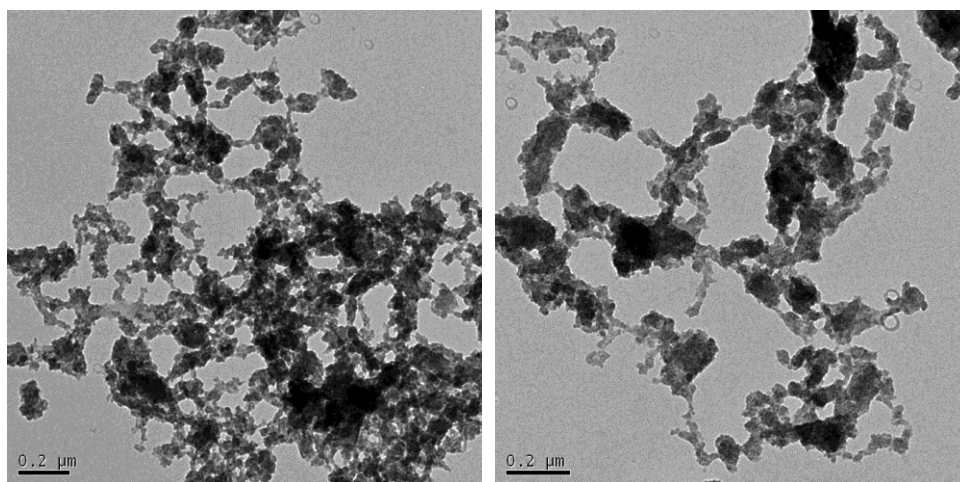

**Fig.S1.** TEM images of bare CdSe nanoparticles synthesized in aqueous medium *via* electron beam irradiation.
